# Supplementary material
Source: PubMed Central journal article supplement (PMC6465067)

**Supplemental Tables****Table S1.** Definition of (A) cardiovascular mortality and (B) infectious mortality

|              |                                                                                                                                                                                                                                                                                                                                                                                                                                                                                                                                                                                                                                                                                                                                                                                                                                                                                        |
|--------------|----------------------------------------------------------------------------------------------------------------------------------------------------------------------------------------------------------------------------------------------------------------------------------------------------------------------------------------------------------------------------------------------------------------------------------------------------------------------------------------------------------------------------------------------------------------------------------------------------------------------------------------------------------------------------------------------------------------------------------------------------------------------------------------------------------------------------------------------------------------------------------------|
| <b>(A)</b>   | <b>Cardiovascular Mortality</b>                                                                                                                                                                                                                                                                                                                                                                                                                                                                                                                                                                                                                                                                                                                                                                                                                                                        |
| Death due to | <ul style="list-style-type: none"> <li>acute myocardial infarction</li> <li>pericarditis (including cardiac tamponade)</li> <li>atherosclerotic heart disease</li> <li>cardiomyopathy</li> <li>cardiac arrhythmia</li> <li>cardiac arrest (cause unknown)</li> <li>valvular heart disease</li> <li>congestive heart failure</li> <li>pulmonary edema due to exogenous fluid</li> <li>pulmonary embolus</li> <li>cerebrovascular accident including intracranial hemorrhage and ischemic brain damage/anoxic encephalopathy</li> </ul>                                                                                                                                                                                                                                                                                                                                                  |
| <b>(B)</b>   | <b>Infectious Mortality</b>                                                                                                                                                                                                                                                                                                                                                                                                                                                                                                                                                                                                                                                                                                                                                                                                                                                            |
| Death due to | <ul style="list-style-type: none"> <li>septicemia due to internal vascular access</li> <li>septicemia due to vascular access catheter</li> <li>peritoneal access infectious complication (bacterial)</li> <li>peritoneal access infectious complication (fungal)</li> <li>peritonitis (complication of peritoneal dialysis)</li> <li>central nervous system infection (brain abscess, meningitis, encephalitis, etc.)</li> <li>septicemia due to peripheral vascular disease (gangrene)</li> <li>septicemia (other than cardiac infection [endocarditis])</li> <li>septicemia due to vascular access</li> <li>other infectious disease</li> <li>cardiac infection (endocarditis)</li> <li>pulmonary infection (pneumonia, influenza)</li> <li>abdominal infection (peritonitis [not component of peritoneal dialysis, perforated bowel, diverticular disease, gallbladder])</li> </ul> |

genital-urinary infection (urinary tract infection, pyelonephritis, renal abscess)  
hepatitis B  
hepatitis C  
other viral hepatitis

**Table S2.** Linear regressions and correlations of baseline MCV with various laboratory data

| Laboratory Variable            | $\beta$ Coefficient (95%CI) | Correlation (95%CI)     | P      |
|--------------------------------|-----------------------------|-------------------------|--------|
| Serum Laboratory Values        |                             |                         |        |
| Albumin (per .5 g/dL)          | -1.20 (-1.35, -1.05)        | -0.047 (-0.053, -0.042) | <0.001 |
| ALP (per 100 IU/L)             | 0.23 (0.18, 0.28)           | 0.028 (0.022, 0.034)    | <0.001 |
| B12 (per 100 pg/mL)            | 0.09 (0.05, 0.12)           | 0.040 (0.023, 0.058)    | <0.001 |
| Bicarbonate (mEq/L)            | -0.001 (-0.014, 0.012)      | -0.001 (-0.006, 0.005)  | 0.877  |
| Calcium (mg/dL)                | 0.41 (0.34, 0.47)           | 0.038 (0.032, 0.044)    | <0.001 |
| Creatinine (mg/dL)             | -0.34 (-0.36, -0.33)        | -0.135 (-0.141, -0.129) | <0.001 |
| Ferritin (per 500 ng/mL)       | 0.79 (0.74, 0.83)           | 0.141 (0.135, 0.147)    | <0.001 |
| Folate (per 5 ng/mL)           | 0.36 (0.22, 0.51)           | 0.051 (0.031, 0.072)    | <0.001 |
| Hemoglobin (g/dL)              | 0.18 (0.15, 0.21)           | 0.035 (0.029, 0.041)    | <0.001 |
| iPTH (per 250 pg/mL)           | -0.29 (-0.32, -0.27)        | -0.092 (-0.098, -0.086) | <0.001 |
| Iron (ug/dL)                   | 0.056 (0.054, 0.058)        | 0.185 (0.18, 0.191)     | <0.001 |
| Iron Saturation (%)            | 0.153 (0.149, 0.157)        | 0.230 (0.224, 0.235)    | <0.001 |
| KRU (ml/min)                   | -0.14 (-0.16, -0.13)        | -0.085 (-0.095, -0.074) | <0.001 |
| LDH (U/L)                      | 0.004 (0.004, 0.005)        | 0.028 (0.023, 0.034)    | <0.001 |
| Lymphocyte (per 10 %)          | -0.35 (-0.40, -0.30)        | -0.043 (-0.049, -0.037) | <0.001 |
| nPCR (g/kg/d)                  | -0.41 (-0.57, -0.24)        | -0.015 (-0.021, -0.009) | <0.001 |
| Phosphorus (mg/dL)             | -0.38 (-0.41, -0.35)        | -0.073 (-0.079, -0.067) | <0.001 |
| RDW (%)                        | -0.17 (-0.19, -0.15)        | -0.050 (-0.056, -0.044) | <0.001 |
| Reticulocyte (%)               | 0.04 (-0.05, 0.14)          | -0.020 (-0.036, -0.004) | 0.355  |
| spKt/V (per 1 unit)            | 1.60 (1.49, 1.71)           | 0.086 (0.08, 0.092)     | <0.001 |
| TIBC (per 10 $\mu$ g/dL)       | -0.08 (-0.09, -0.07)        | -0.066 (-0.072, -0.06)  | <0.001 |
| WBC count, $\times 10^3/\mu$ L | -0.02 (-0.03, -0.01)        | -0.009 (-0.014, -0.003) | 0.005  |
| Medications                    |                             |                         |        |
| ESA Use (per 1,000)            | -0.002 (-0.005, 0.001)      | -0.001 (-0.007, 0.005)  | 0.228  |
| IV Iron (per 100 mg)           | -0.069 (-0.074, -0.064)     | -0.080 (-0.086, -0.075) | <0.001 |

*Abbreviations:* ALP, alkaline phosphatase; B12; vitamin B12; iPTH, intact parathyroid hormone; KRU residual renal urea clearance; LDH, lactate dehydrogenase; nPCR, normalized protein catabolic rate; RDW, red cell distribution width; spKt/V, single-pooled Kt/V; TIBC, total iron binding capacity; WBC, white blood cell count; ESA, erythropoiesis stimulating; IV, intravenous

**Table S3.** Five-year baseline all-cause mortality hazard ratios across MCV groups

| MCV<br>[fl] | n      | mortality<br>n [row %] | mortality rate<br>per 1,000<br>person-years | Unadjusted           |        | Case-Mix             |        | Case-Mix + MICS      |        |
|-------------|--------|------------------------|---------------------------------------------|----------------------|--------|----------------------|--------|----------------------|--------|
|             |        |                        |                                             | HR<br>(95% CI)       | P      | HR<br>(95% CI)       | P      | HR<br>(95% CI)       | P      |
| <86         | 12,029 | 2,689 [22]             | 117<br>(113, 121)                           | 0.76<br>(0.73, 0.80) | <0.001 | 0.99<br>(0.94, 1.04) | 0.57   | 0.98<br>(0.94, 1.03) | 0.51   |
| 86-<88      | 8,441  | 1,807 [21]             | 117<br>(112, 123)                           | 0.76<br>(0.72, 0.81) | <0.001 | 0.92<br>(0.87, 0.97) | 0.002  | 0.92<br>(0.87, 0.97) | 0.002  |
| 88-<90      | 12,032 | 2,680 [22]             | 124<br>(120, 129)                           | 0.81<br>(0.77, 0.85) | <0.001 | 0.93<br>(0.88, 0.97) | 0.002  | 0.92<br>(0.88, 0.97) | 0.002  |
| 90-<92      | 14,884 | 3,505 [24]             | 136<br>(132, 141)                           | 0.89<br>(0.85, 0.93) | <0.001 | 0.96<br>(0.91, 1.00) | 0.05   | 0.95<br>(0.91, 0.99) | 0.03   |
| 92-<94      | 15,983 | 4,146 [26]             | 153<br>(148, 157)                           | 1-referent           |        | 1-referent           |        | 1-referent           |        |
| 94-<96      | 14,490 | 3,831 [26]             | 160<br>(155, 165)                           | 1.05<br>(1.01, 1.10) | 0.026  | 1.01<br>(0.96, 1.05) | 0.82   | 1.00<br>(0.95, 1.04) | 0.92   |
| 96-<98      | 11,366 | 3,364 [30]             | 186<br>(180, 193)                           | 1.22<br>(1.17, 1.28) | <0.001 | 1.11<br>(1.06, 1.16) | <0.001 | 1.12<br>(1.07, 1.17) | <0.001 |
| 98-<100     | 8,081  | 2,520 [31]             | 200<br>(193, 208)                           | 1.32<br>(1.25, 1.39) | <0.001 | 1.14<br>(1.08, 1.20) | <0.001 | 1.13<br>(1.07, 1.19) | <0.001 |
| 100+        | 12,195 | 4,432 [36]             | 250<br>(243, 257)                           | 1.65<br>(1.58, 1.72) | <0.001 | 1.35<br>(1.29, 1.41) | <0.001 | 1.28<br>(1.22, 1.34) | <0.001 |

**Table S4.** Five-year time varying all-cause mortality hazard ratios across MCV groups

| MCV<br>[f] | Unadjusted           |        | Case-Mix             |        | Case-Mix + MICS      |        |
|------------|----------------------|--------|----------------------|--------|----------------------|--------|
|            | HR<br>(95% CI)       | P      | HR<br>(95% CI)       | P      | HR<br>(95% CI)       | P      |
| <86        | 0.93<br>(0.87, 0.98) | 0.011  | 1.05<br>(0.98, 1.11) | 0.149  | 0.97<br>(0.92, 1.03) | 0.351  |
| 86-<88     | 0.90<br>(0.84, 0.97) | 0.004  | 0.99<br>(0.93, 1.06) | 0.832  | 0.94<br>(0.88, 1.01) | 0.099  |
| 88-<90     | 0.92<br>(0.86, 0.97) | 0.004  | 0.96<br>(0.90, 1.02) | 0.177  | 0.92<br>(0.87, 0.98) | 0.006  |
| 90-<92     | 0.92<br>(0.88, 0.98) | 0.005  | 0.95<br>(0.90, 1.00) | 0.049  | 0.93<br>(0.88, 0.99) | 0.014  |
| 92-<94     | 1-referent           |        | 1-referent           |        | 1-referent           |        |
| 94-<96     | 1.05<br>(1.00, 1.10) | 0.074  | 1.01<br>(0.96, 1.06) | 0.746  | 0.99<br>(0.94, 1.04) | 0.685  |
| 96-<98     | 1.14<br>(1.09, 1.20) | <0.001 | 1.09<br>(1.03, 1.14) | 0.001  | 1.08<br>(1.03, 1.13) | 0.003  |
| 98-<100    | 1.26<br>(1.20, 1.32) | <0.001 | 1.15<br>(1.10, 1.21) | <0.001 | 1.12<br>(1.07, 1.18) | <0.001 |
| 100+       | 1.79<br>(1.72, 1.87) | <0.001 | 1.54<br>(1.47, 1.60) | <0.001 | 1.39<br>(1.33, 1.45) | <0.001 |

**Table S5.** Five-year baseline cardiovascular mortality hazard ratios across MCV groups

| MCV<br>[fl] | n      | Mortality<br>n [row %] | mortality rate<br>per 1,000<br>person-years | Unadjusted           |        | Case-Mix             |        | Case-Mix + MICS      |        |
|-------------|--------|------------------------|---------------------------------------------|----------------------|--------|----------------------|--------|----------------------|--------|
|             |        |                        |                                             | HR<br>(95%CI)        | P      | HR<br>(95%CI)        | P      | HR<br>(95%CI)        | P      |
| <86         | 12,029 | 1,007 [8.4]            | 44 (41, 47)                                 | 0.80<br>(0.74, 0.86) | <0.001 | 1.01<br>(0.93, 1.10) | 0.810  | 0.99<br>(0.91, 1.07) | 0.743  |
| 86-<88      | 8,441  | 701 [8.3]              | 45 (42, 49)                                 | 0.83<br>(0.76, 0.91) | <0.001 | 0.97<br>(0.89, 1.07) | 0.569  | 0.96<br>(0.88, 1.05) | 0.372  |
| 88-<90      | 12,032 | 985 [8.2]              | 46 (43, 49)                                 | 0.83<br>(0.77, 0.9)  | <0.001 | 0.94<br>(0.86, 1.01) | 0.106  | 0.93<br>(0.86, 1.01) | 0.068  |
| 90-<92      | 14,884 | 1,252 [8.4]            | 49 (46, 51)                                 | 0.89<br>(0.82, 0.96) | 0.002  | 0.95<br>(0.88, 1.02) | 0.148  | 0.94<br>(0.87, 1.01) | 0.099  |
| 92-<94      | 15,983 | 1,483 [9.3]            | 55 (52, 57)                                 | 1-referent           |        | 1-referent           |        | 1-referent           |        |
| 94-<96      | 14,490 | 1,330 [9.2]            | 56 (53, 59)                                 | 1.02<br>(0.95, 1.1)  | 0.588  | 0.98<br>(0.91, 1.06) | 0.625  | 0.98<br>(0.91, 1.05) | 0.581  |
| 96-<98      | 11,366 | 1,114 [9.8]            | 62 (58, 65)                                 | 1.13<br>(1.05, 1.23) | 0.002  | 1.04<br>(0.96, 1.12) | 0.344  | 1.05<br>(0.97, 1.14) | 0.195  |
| 98-<100     | 8,081  | 872 [10.8]             | 69 (65, 74)                                 | 1.28<br>(1.17, 1.39) | <0.001 | 1.13<br>(1.04, 1.23) | 0.005  | 1.13<br>(1.04, 1.23) | 0.005  |
| 100+        | 12,195 | 1,470 [12.1]           | 83 (79, 87)                                 | 1.53<br>(1.43, 1.65) | <0.001 | 1.30<br>(1.21, 1.39) | <0.001 | 1.27<br>(1.18, 1.36) | <0.001 |

**Table S6.** Five-year time varying cardiovascular mortality hazard ratios across MCV groups

| MCV<br>[f] | Unadjusted           |        | Case-Mix             |        | Case-Mix + MICS      |        |
|------------|----------------------|--------|----------------------|--------|----------------------|--------|
|            | HR<br>(95%CI)        | P      | HR<br>(95%CI)        | P      | HR<br>(95%CI)        | P      |
| <86        | 0.93<br>(0.84, 1.02) | 0.141  | 1.05<br>(0.95, 1.15) | 0.358  | 0.96<br>(0.87, 1.06) | 0.423  |
| 86-<88     | 0.87<br>(0.78, 0.98) | 0.021  | 0.95<br>(0.85, 1.07) | 0.417  | 0.90<br>(0.80, 1.01) | 0.077  |
| 88-<90     | 0.94<br>(0.85, 1.04) | 0.22   | 0.99<br>(0.89, 1.09) | 0.766  | 0.95<br>(0.86, 1.04) | 0.27   |
| 90-<92     | 0.83<br>(0.76, 0.91) | <0.001 | 0.85<br>(0.77, 0.93) | 0.001  | 0.83<br>(0.76, 0.91) | <0.001 |
| 92-<94     | 1-referent           |        | 1-referent           |        | 1-referent           |        |
| 94-<96     | 0.99<br>(0.91, 1.08) | 0.844  | 0.96<br>(0.89, 1.04) | 0.348  | 0.95<br>(0.87, 1.03) | 0.196  |
| 96-<98     | 1.06<br>(0.97, 1.15) | 0.178  | 1.01<br>(0.93, 1.10) | 0.799  | 1.01<br>(0.93, 1.09) | 0.893  |
| 98-<100    | 1.21<br>(1.12, 1.32) | <0.001 | 1.12<br>(1.03, 1.22) | 0.007  | 1.10<br>(1.01, 1.20) | 0.024  |
| 100+       | 1.62<br>(1.51, 1.74) | <0.001 | 1.42<br>(1.32, 1.52) | <0.001 | 1.32<br>(1.23, 1.42) | <0.001 |



**Table S7.** Five-year baseline cardiovascular mortality competing risk regression subhazard ratios across MCV groups for cardiovascular mortality with non-cardiovascular mortality as a competing event

| MCV [fl] | Unadjusted           |        | Case-Mix             |        | Case-Mix + MICS      |        |
|----------|----------------------|--------|----------------------|--------|----------------------|--------|
|          | SHR<br>(95% CI)      | P      | SHR<br>(95% CI)      | P      | SHR<br>(95% CI)      | P      |
| <86      | 0.83<br>(0.77, 0.90) | <0.001 | 1.01<br>(0.93, 1.09) | 0.843  | 0.99<br>(0.91, 1.07) | 0.8    |
| 86-<88   | 0.86<br>(0.79, 0.94) | 0.001  | 0.99<br>(0.90, 1.08) | 0.804  | 0.98<br>(0.89, 1.07) | 0.615  |
| 88-<90   | 0.86<br>(0.79, 0.93) | <0.001 | 0.94<br>(0.87, 1.02) | 0.165  | 0.94<br>(0.87, 1.02) | 0.136  |
| 90-<92   | 0.9<br>(0.84, 0.97)  | 0.007  | 0.95<br>(0.88, 1.02) | 0.169  | 0.94<br>(0.88, 1.02) | 0.136  |
| 92-<94   | 1-referent           |        | 1-referent           |        | 1-referent           |        |
| 94-<96   | 1.01<br>(0.94, 1.09) | 0.781  | 0.98<br>(0.91, 1.05) | 0.527  | 0.98<br>(0.91, 1.05) | 0.505  |
| 96-<98   | 1.09<br>(1.01, 1.18) | 0.029  | 1.01<br>(0.94, 1.09) | 0.755  | 1.02<br>(0.94, 1.10) | 0.649  |
| 98-<100  | 1.22<br>(1.12, 1.32) | <0.001 | 1.10<br>(1.01, 1.19) | 0.032  | 1.09<br>(1.00, 1.19) | 0.04   |
| ≥ 100    | 1.38<br>(1.28, 1.48) | <0.001 | 1.20<br>(1.12, 1.29) | <0.001 | 1.17<br>(1.09, 1.27) | <0.001 |

**Table S8.** Five-year baseline infectious mortality hazard ratios across MCV groups

| MCV<br>[fl] | n      | Mortality<br>n [row %] | mortality rate<br>per 1,000<br>person-years | Unadjusted           |        | Case-Mix             |       | Case-Mix + MICS      |       |
|-------------|--------|------------------------|---------------------------------------------|----------------------|--------|----------------------|-------|----------------------|-------|
|             |        |                        |                                             | HR<br>(95%CI)        | P      | HR<br>(95%CI)        | P     | HR<br>(95%CI)        | P     |
| <86         | 12,029 | 207 [1.7]              | 9 (8, 10)                                   | 0.70<br>(0.59, 0.83) | <0.001 | 0.86<br>(0.72, 1.02) | 0.091 | 0.87<br>(0.73, 1.03) | 0.108 |
| 86-<88      | 8,441  | 131 [1.5]              | 8 (7, 10)                                   | 0.66<br>(0.54, 0.80) | <0.001 | 0.77<br>(0.63, 0.94) | 0.012 | 0.77<br>(0.63, 0.95) | 0.012 |
| 88-<90      | 12,032 | 204 [1.6]              | 9 (8, 11)                                   | 0.73<br>(0.62, 0.87) | <0.001 | 0.82<br>(0.69, 0.98) | 0.027 | 0.82<br>(0.69, 0.98) | 0.026 |
| 90-<92      | 14,884 | 284 [1.9]              | 11 (10, 12)                                 | 0.85<br>(0.73, 1.00) | 0.047  | 0.91<br>(0.78, 1.07) | 0.260 | 0.91<br>(0.78, 1.06) | 0.240 |
| 92-<94      | 15,983 | 350 [2.2]              | 13 (12, 14)                                 | 1-referent           |        | 1-referent           |       | 1-referent           |       |
| 94-<96      | 14,490 | 261 [1.8]              | 11 (10, 12)                                 | 0.85<br>(0.72, 1.00) | 0.044  | 0.81<br>(0.69, 0.95) | 0.011 | 0.80<br>(0.68, 0.94) | 0.007 |
| 96-<98      | 11,366 | 271 [2.4]              | 15 (13, 17)                                 | 1.16<br>(0.99, 1.37) | 0.059  | 1.06<br>(0.90, 1.24) | 0.480 | 1.07<br>(0.91, 1.25) | 0.413 |
| 98-<100     | 8,081  | 186 [2.3]              | 15 (13, 17)                                 | 1.15<br>(0.96, 1.37) | 0.125  | 1.00<br>(0.83, 1.19) | 0.974 | 0.99<br>(0.82, 1.18) | 0.875 |
| 100+        | 12,195 | 351 [2.9]              | 20 (18, 22)                                 | 1.54<br>(1.33, 1.79) | <0.001 | 1.27<br>(1.09, 1.48) | 0.002 | 1.18<br>(1.02, 1.38) | 0.03  |

**Table S9.** Five-year time varying infectious mortality hazard ratios across MCV groups

| MCV<br>[f] | Unadjusted           |        | Case-Mix             |        | Case-Mix + MICS      |        |
|------------|----------------------|--------|----------------------|--------|----------------------|--------|
|            | HR<br>(95%CI)        | P      | HR<br>(95%CI)        | P      | HR<br>(95%CI)        | P      |
| <86        | 1.06<br>(0.85, 1.30) | 0.619  | 1.05<br>(0.95, 1.15) | 0.358  | 1.12<br>(0.91, 1.39) | 0.285  |
| 86-<88     | 0.92<br>(0.72, 1.19) | 0.542  | 0.95<br>(0.85, 1.07) | 0.417  | 0.97<br>(0.75, 1.26) | 0.834  |
| 88-<90     | 1.08<br>(0.87, 1.33) | 0.481  | 0.99<br>(0.89, 1.09) | 0.766  | 1.10<br>(0.89, 1.35) | 0.390  |
| 90-<92     | 0.92<br>(0.75, 1.13) | 0.415  | 0.85<br>(0.77, 0.93) | 0.001  | 0.93<br>(0.76, 1.13) | 0.459  |
| 92-<94     | 1-referent           |        | 1-referent           |        | 1-referent           |        |
| 94-<96     | 1.11<br>(0.92, 1.33) | 0.265  | 0.96<br>(0.89, 1.04) | 0.348  | 1.07<br>(0.89, 1.29) | 0.444  |
| 96-<98     | 1.17<br>(0.98, 1.40) | 0.091  | 1.01<br>(0.93, 1.10) | 0.799  | 1.13<br>(0.94, 1.36) | 0.183  |
| 98-<100    | 1.48<br>(1.24, 1.78) | <0.001 | 1.12<br>(1.03, 1.22) | 0.007  | 1.39<br>(1.16, 1.66) | <0.001 |
| 100+       | 1.93<br>(1.66, 2.25) | <0.001 | 1.42<br>(1.32, 1.52) | <0.001 | 1.71<br>(1.47, 1.99) | <0.001 |

**Table S10.** Five-year baseline infectious mortality competing risk regression subhazard ratios across MCV groups for infectious mortality with non-infectious mortality as a competing event

| MCV [fl] | Unadjusted           |        | Case-Mix             |       | Case-Mix + MICS      |       |
|----------|----------------------|--------|----------------------|-------|----------------------|-------|
|          | SHR<br>(95% CI)      | P      | SHR<br>(95% CI)      | P     | SHR<br>(95% CI)      | P     |
| <86      | 0.74<br>(0.62, 0.87) | <0.001 | 0.86<br>(0.72, 1.03) | 0.095 | 0.87<br>(0.73, 1.03) | 0.110 |
| 86-<88   | 0.69<br>(0.56, 0.84) | <0.001 | 0.78<br>(0.64, 0.96) | 0.018 | 0.78<br>(0.64, 0.96) | 0.017 |
| 88-<90   | 0.76<br>(0.64, 0.90) | 0.002  | 0.83<br>(0.70, 0.99) | 0.042 | 0.84<br>(0.70, 0.99) | 0.043 |
| 90-<92   | 0.87<br>(0.74, 1.02) | 0.079  | 0.92<br>(0.79, 1.08) | 0.292 | 0.92<br>(0.79, 1.08) | 0.295 |
| 92-<94   | 1-referent           |        | 1-referent           |       | 1-referent           |       |
| 94-<96   | 0.84<br>(0.71, 0.98) | 0.029  | 0.81<br>(0.69, 0.95) | 0.008 | 0.79<br>(0.67, 0.93) | 0.004 |
| 96-<98   | 1.12<br>(0.95, 1.31) | 0.168  | 1.04<br>(0.89, 1.22) | 0.645 | 1.03<br>(0.88, 1.21) | 0.675 |
| 98-<100  | 1.08<br>(0.91, 1.29) | 0.387  | 0.96<br>(0.81, 1.15) | 0.677 | 0.94<br>(0.79, 1.12) | 0.497 |
| ≥ 100    | 1.37<br>(1.18, 1.59) | <0.001 | 1.16<br>(1.00, 1.35) | 0.046 | 1.09<br>(0.93, 1.27) | 0.288 |

**Table S11.** Sample size per subgroup

| Subgroup                      | n       |
|-------------------------------|---------|
| All Patients                  | 109,501 |
| Age <65 years                 | 56,578  |
| Age ≥65 years                 | 52,923  |
| African American              | 34,379  |
| White                         | 51,050  |
| Hispanic                      | 16,236  |
| Female                        | 47,690  |
| Male                          | 61,811  |
| BMI ≥25 kg/m <sup>2</sup>     | 66,537  |
| BMI <25 kg/m <sup>2</sup>     | 42,829  |
| Diabetes                      | 64,042  |
| No Diabetes                   | 45,459  |
| CHF                           | 40,294  |
| No CHF                        | 69,207  |
| spKt/V ≥1.2                   | 89,449  |
| spKt/V <1.2                   | 19,813  |
| Albumin ≥4 g/dl               | 15,544  |
| Albumin <4 g/dl               | 93,802  |
| nPCR ≥0.79 g/kg/day           | 49,760  |
| nPCR <0.79 g/kg/day           | 58,245  |
| WBC ≥11 x10 <sup>3</sup> /μL  | 10,197  |
| WBC <11 x10 <sup>3</sup> /μL  | 99,215  |
| Lymphocyte ≥21 %              | 48,535  |
| Lymphocyte <21 %              | 60,942  |
| Hemoglobin ≥12 g/dl           | 24,990  |
| Hemoglobin <12 g/dl           | 84,426  |
| RDW ≥15.5 %                   | 71,849  |
| RDW <15.5 %                   | 37,558  |
| Ferritin ≥800 ng/ml           | 10,157  |
| Ferritin <800 ng/ml           | 97,927  |
| Iron ≥50 μg/dl                | 47,799  |
| Iron <50 μg/dl                | 61,168  |
| Iron Saturation ≥22 %         | 52,469  |
| Iron Saturation <22 %         | 56,285  |
| TIBC ≥200 μg/l                | 76,235  |
| TIBC <200 μg/l                | 32,585  |
| IV Iron >1,000 mg/month       | 57,040  |
| IV Iron >0 to ≤1,000 mg/month | 39,871  |
| IV Iron =0 mg/month           | 12,590  |
| ESA Use ≥5,000 U/week         | 53,273  |
| ESA Use <5,000 U/week         | 56,263  |
| B12 ≥620 pg/ml                | 6,358   |
| B12 <620 pg/ml                | 6,333   |
| Folate ≥9.6 ng/ml             | 4,697   |
| Folate <9.6 ng/ml             | 4,596   |

*Abbreviations:* BMI, body mass index; CHF, congestive heart failure ; spKt/V, single-pooled Kt/V; nPCR, normalized protein catabolic rate; WBC, white blood cell count; RDW, red cell distribution width; TIBC, total iron binding capacity; IV, intravenous; ESA, erythropoiesis stimulating; B12, vitamin B12

**Table S12.** Tests for interaction between MCV  $\geq$ 93 fl and subgroups in fully adjusted models

| <b>Subgroup</b> | <b>All-Cause Mortality</b> | <b>Cardiovascular Mortality</b> | <b>Infectious Mortality</b> |
|-----------------|----------------------------|---------------------------------|-----------------------------|
|                 | <b>P-int</b>               | <b>P-int</b>                    | <b>P-int</b>                |
| Age             | 0.1925                     | 0.8171                          | 0.4891                      |
| Race            | 0.0123                     | 0.2416                          | 0.0993                      |
| Sex             | 0.1126                     | 0.2167                          | 0.981                       |
| BMI             | 0.0144                     | 0.1260                          | 0.3328                      |
| Diabetes        | 0.0478                     | 0.1411                          | 0.0506                      |
| CHF             | 0.1563                     | 0.0228                          | 0.1518                      |
| Dialysis Dose   | <0.001                     | 0.0112                          | 0.1108                      |
| Albumin         | 0.2286                     | 0.691                           | 0.7585                      |
| nPCR            | 0.8961                     | 0.767                           | 0.6297                      |
| WBC             | 0.0683                     | 0.507                           | 0.4089                      |
| Lymphocyte      | 0.8774                     | 0.3559                          | 0.3900                      |
| Hemoglobin      | 0.5433                     | 0.4907                          | 0.8191                      |
| RDW             | 0.7272                     | 0.6088                          | 0.0796                      |
| Ferritin        | 0.1474                     | 0.2683                          | 0.5457                      |
| Iron            | 0.1036                     | 0.7858                          | 0.5399                      |
| Iron Saturation | 0.7272                     | 0.7932                          | 0.3003                      |
| TIBC            | 0.8494                     | 0.8739                          | 0.8809                      |
| IV Iron         | 0.6755                     | 0.6504                          | 0.7886                      |
| ESA Use         | 0.5644                     | 0.8454                          | 0.7129                      |
| B12             | 0.2018                     | 0.0436                          | 0.4851                      |
| Folate          | 0.4011                     | 0.2344                          | 0.9029                      |

*Abbreviations:* BMI, body mass index; CHF, congestive heart failure; nPCR, normalized protein catabolic rate;

RDW, red cell distribution width; TIBC, total iron binding capacity; IV, intravenous; ESA, erythropoiesis

stimulating; B12, vitamin B12; and P-int, P-interaction

**Supplemental Figures****Figure S1.** Flow chart of patient selection for the cohort.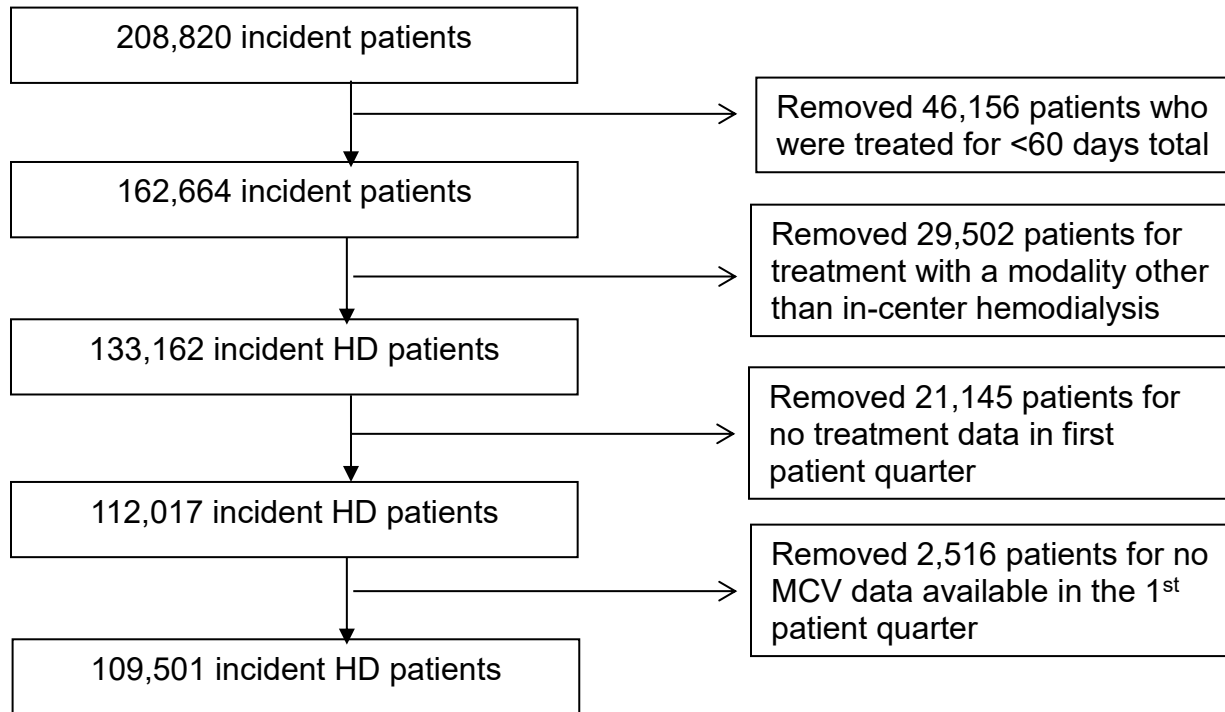

**Figure S2.** Trajectories of quarterly population mean MCV (fl) concentrations (A) across baseline serum MCV groups, (B) across baseline serum MCV groups with adjustment for weekly ESA dose and cumulative monthly IV iron dose, (C) stratified by 4 baseline weekly ESA dose groups, (D) stratified by 4 baseline weekly ESA dose groups with additional adjustment for weekly ESA dose per patient quarter, (E) stratified by 4 monthly cumulative IV iron dose groups, (F) stratified by 4 baseline monthly cumulative IV iron dose groups with additional adjustment for monthly cumulative IV iron dose per patient quarter during 20 patient quarters.

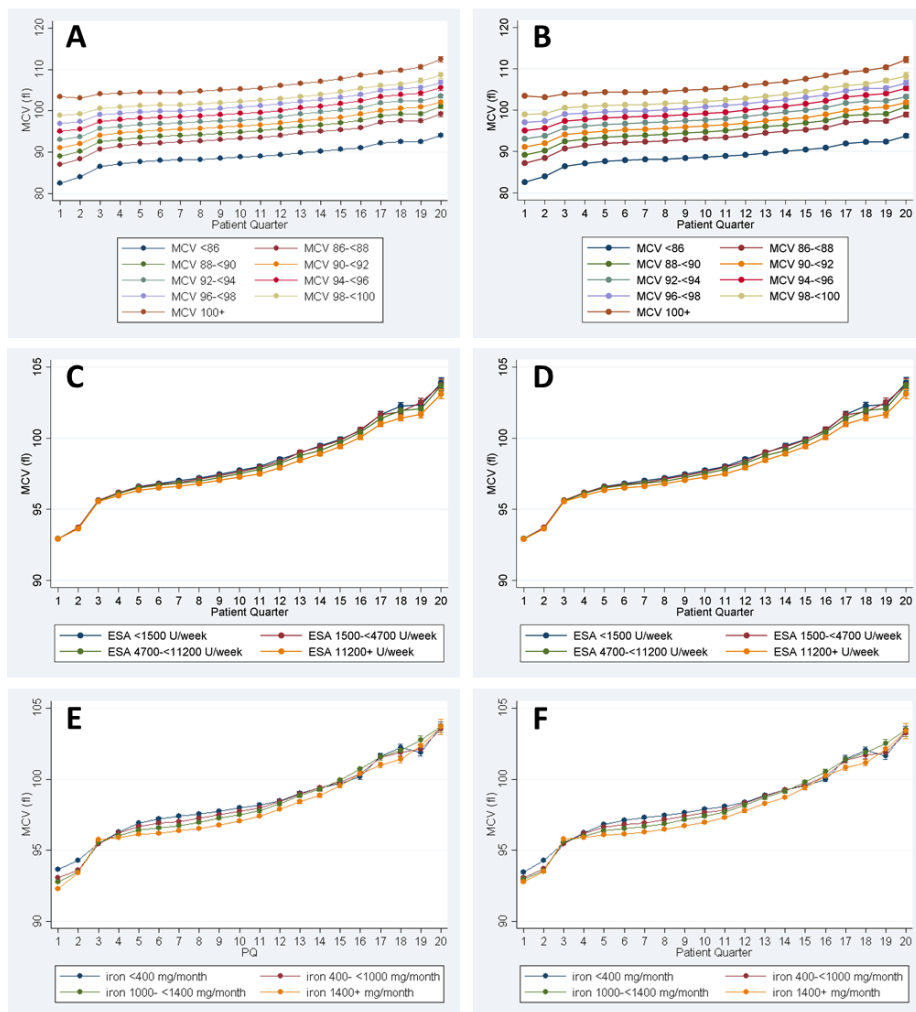



**Figure S3.** Baseline all-cause mortality hazard ratios (and 95%CI error bars) by MCV levels across four levels of multivariable adjustment (A) in 9,293 patients with folate and MCV measurement at baseline, (B) 12,691 patients with B12 and MCV measurement at baseline, and (C) 36,334 patients with KRU and MCV measurement at baseline.

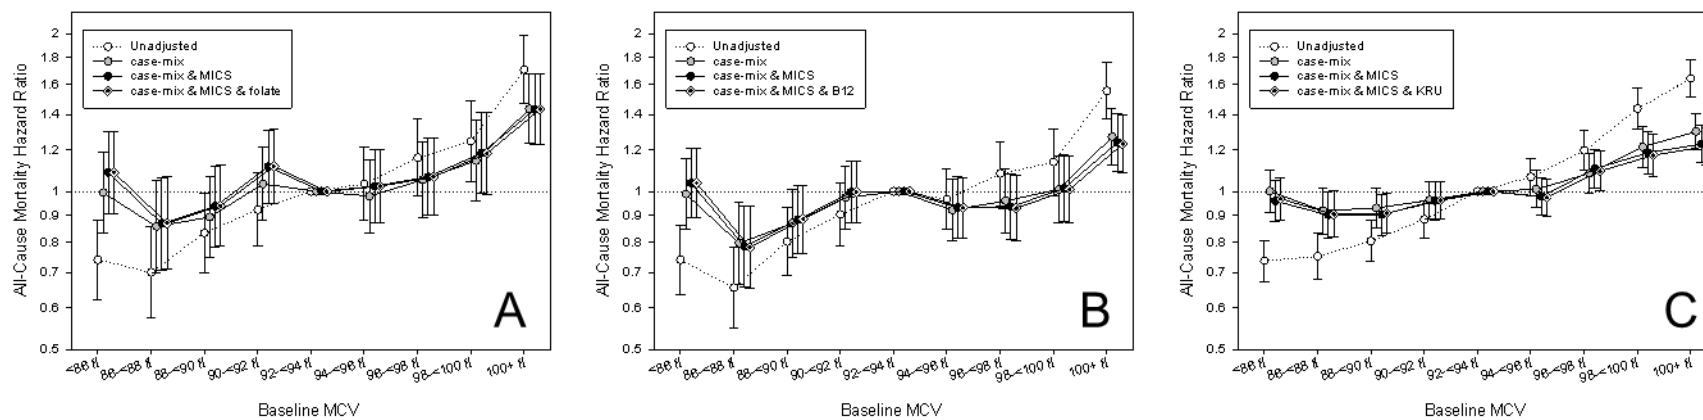

**Figure S4.** Restricted cubic splines of baseline all-cause mortality (A) unadjusted, (B) case-mix, and (C) case-mix plus MICS, baseline cardiovascular mortality (D) unadjusted (E) case-mix, and (F) case-mix plus MICS, and baseline infectious mortality (G) unadjusted, (H) case-mix, and (I) case-mix plus MICS hazard ratios (and 95% CIs) with MCV, over histograms of MCV distribution.

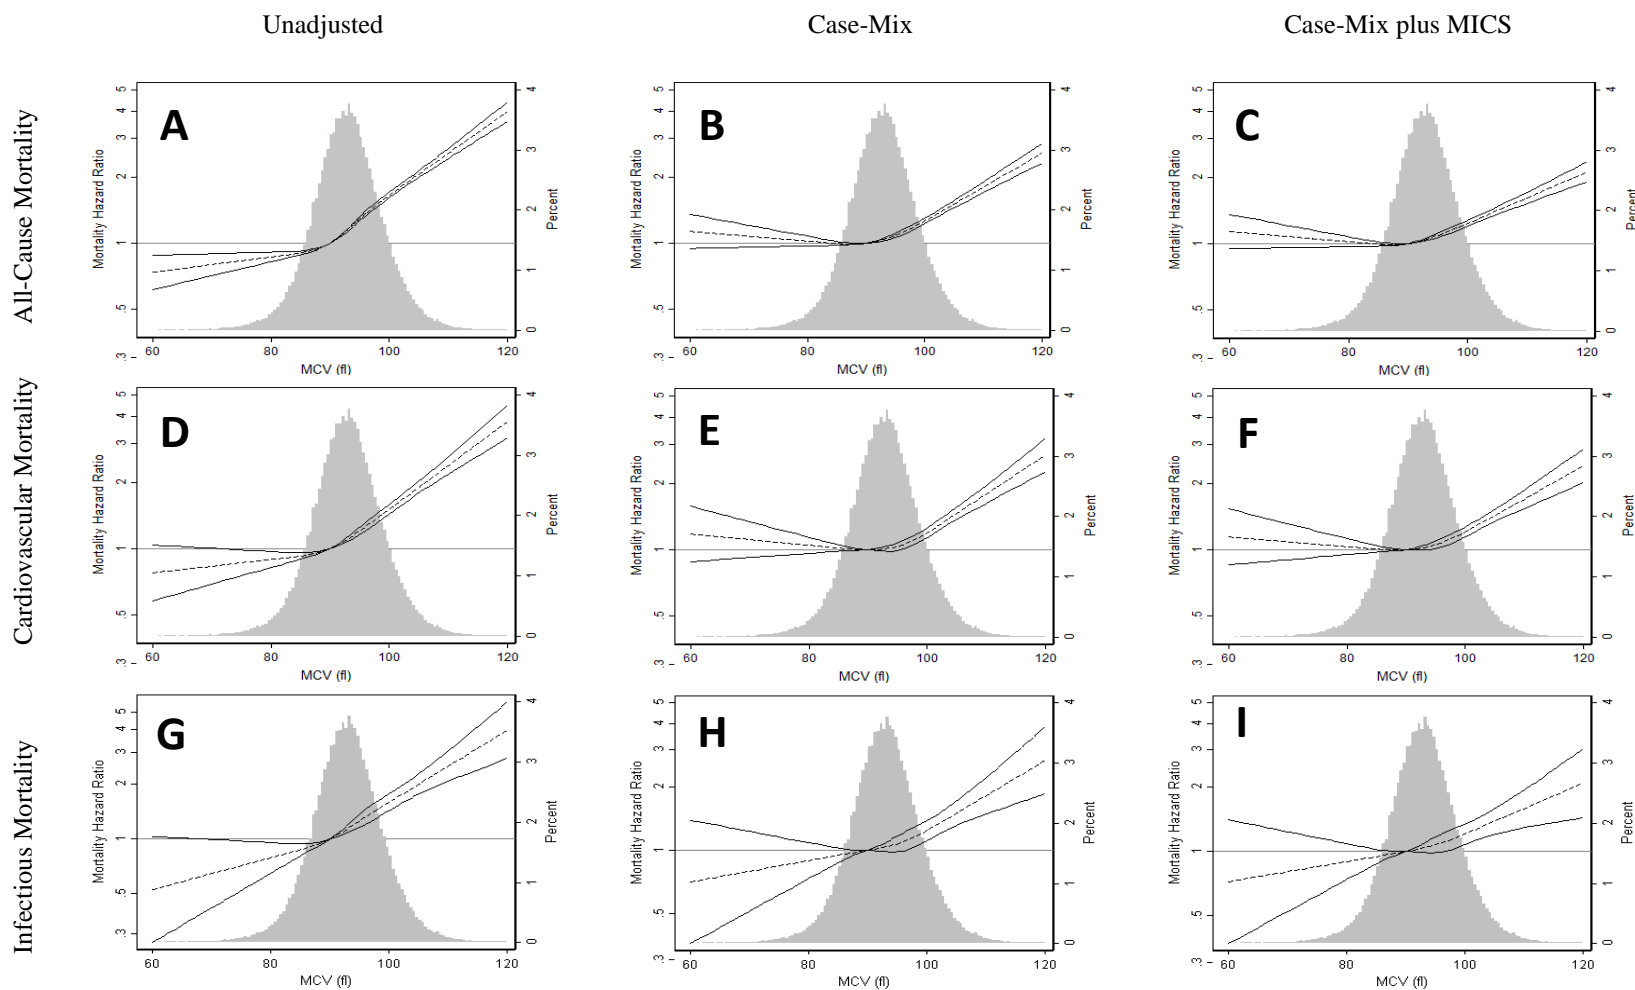

**Figure S5.** Restricted cubic splines of time-varying all-cause mortality (A) unadjusted, (B) case-mix, and (C) case-mix plus MICS, time-varying cardiovascular mortality (D) unadjusted, (E) case-mix, and (F) case-mix plus MICS, and time-varying infectious mortality (G) unadjusted, (H) case-mix, and (I) case-mix plus MICS hazard ratios (and 95% CIs) with MCV.

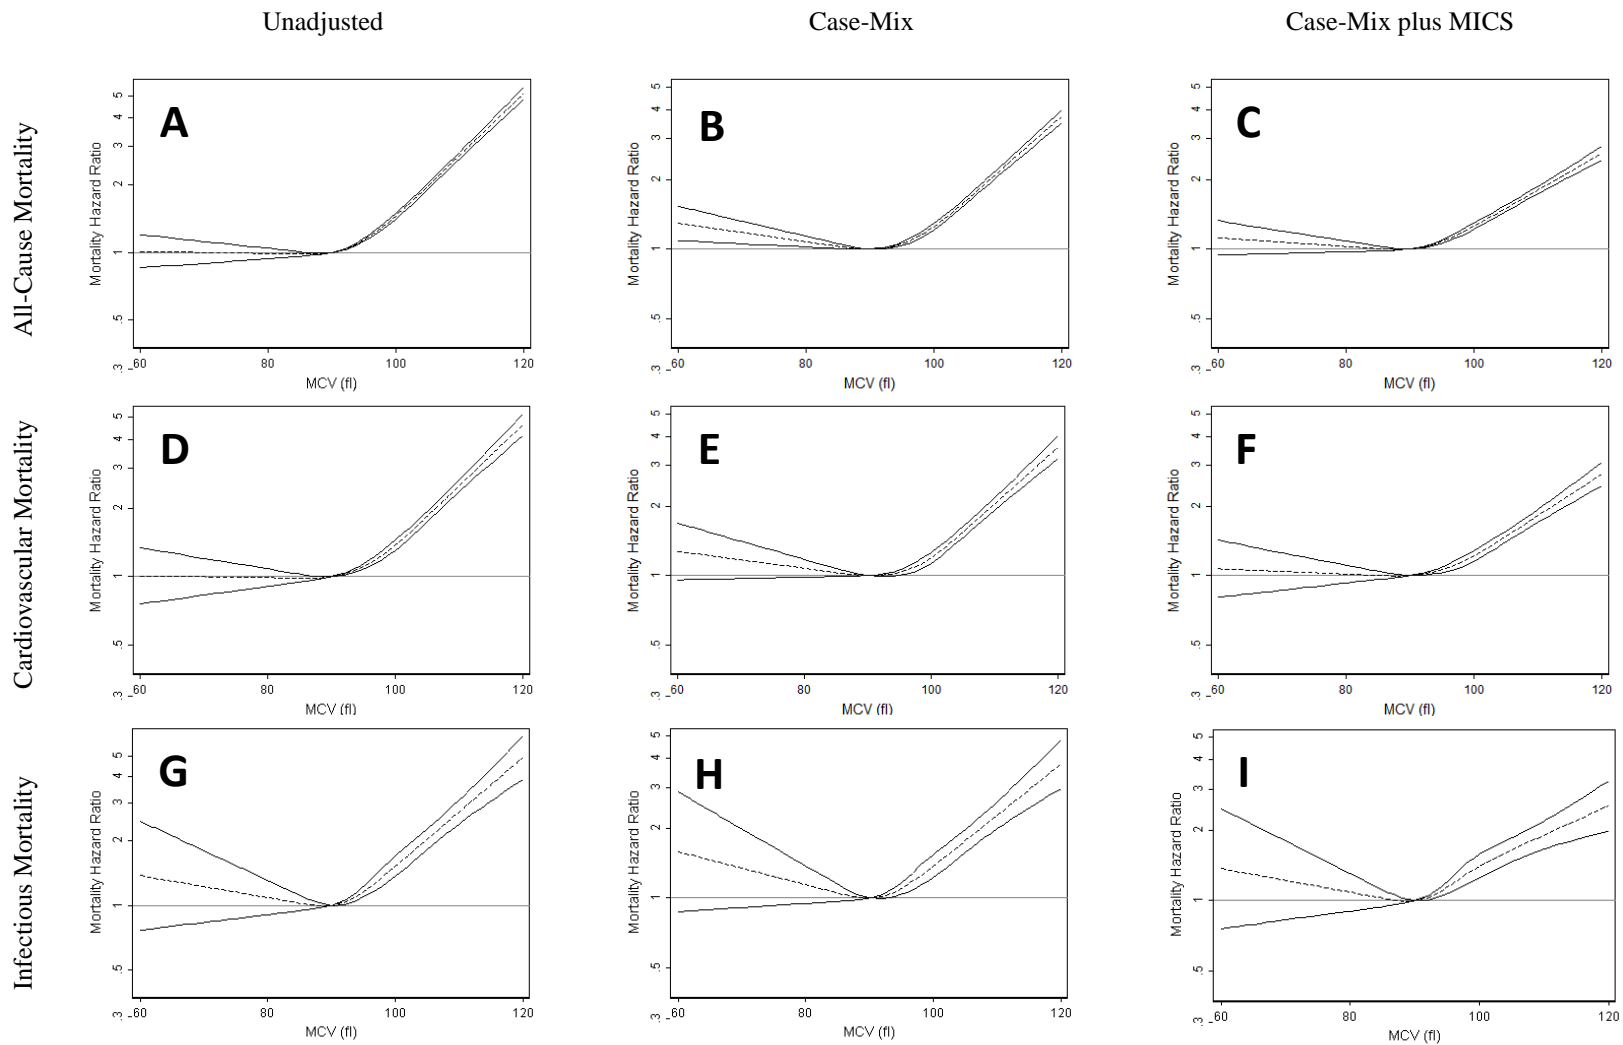

Supplement: NIHMS1005994-supplement-1.pdf [file NIHMS1005994-supplement-1.pdf]
